# Supplementary material
Source: PubMed Central journal article supplement (PMC8844870)
Supplement: NIHMS1585760-supplement-1.pdf [file NIHMS1585760-supplement-1.pdf]

# 1 Rethinking False Spring Risk: Supplement

2 Authors:

3 C. J. Chamberlain <sup>1,2</sup>, B. I. Cook <sup>3</sup>, I. Garcia de Cortazar Atauri <sup>4</sup> & E. M. Wolkovich <sup>1,2</sup>

4 *Author affiliations:*

5 <sup>1</sup>Arnold Arboretum of Harvard University, 1300 Centre Street, Boston, Massachusetts, USA;

6 <sup>2</sup>Organismic & Evolutionary Biology, Harvard University, 26 Oxford Street, Cambridge, Massachusetts, USA;

7 <sup>3</sup>NASA Goddard Institute for Space Studies, New York, New York, USA;

8 <sup>4</sup>French National Institute for Agricultural Research, INRA, US1116 AgroClim, F-84914 Avignon, France

9 \*Corresponding author: 248.953.0189; cchamberlain@g.harvard.edu

10

## 11 **Defining False Spring: An example in one temperate plant community - *methods*** 12 ***for calculating FSI in Harvard Forest example***

13 We collected data for determining biological spring onset using three methods for Harvard Forest. The first  
14 method for was from long-term observational data recorded for 33 tree species by John O’Keefe at Harvard  
15 Forest from 1990 to 2014 (O’Keefe, 2014). Budburst was defined as 50% green tip emergence. We subsetting  
16 this dataset to include only the tree species that were most consistently observed (eight species). The second  
17 dataset was from Harvard Forest’s PhenoCam data, which are field cameras placed in the forest canopy  
18 that take real-time images of plant growth and are programmed to record initial green up. The final set  
19 was “First Leaf - Spring Onset” from the Extended Spring Index (SI-X, USA-NPN, 2016a), accessed via the  
20 “Spring Indices, Historic Annual” gridded layer of the USA National Phenology Network;s (USA-NPN) Data  
21 Visualization tool. The SI-x model was built from historical budburst data from honeysuckle and lilac clones  
22 clones around the U.S. combined with daily recordings from local weather stations (USA-NPN, 2016b; Ault  
23 *et al.*, 2015a,b; Schwartz *et al.*, 2013; Schwartz, 1997). Through assessing past years’ weather and budburst,  
24 scientists are able to determine general weather trends that subsequently lead to leaf out. Based on these  
25 trends, SI-x values are calculated from daily weather data (USA-NPN, 2016b).

26 The date of last spring freeze was gathered from the Fisher Meteorological Station which was downloaded  
27 from the Harvard Forest web page (data available online<sup>1</sup>). The  $T_{min}$  values were used and the last spring  
28 freeze was determined from the latest spring date that the temperature reached -2.2°C or below.

29 PhenoCam data are not available for Harvard Forest until 2008 and observation data is only recorded through

---

<sup>1</sup><http://harvardforest.fas.harvard.edu/meteorological-hydrological-stations>

30 2014, so this evaluation assesses FSI values from 2008 through 2014.

31 The FSI values were calculated for each methodology using the formula based on the study performed by  
32 Marino et al. (2011).

### 33 **How Species' Phenological Cues Shape Vegetative Risk - *methods for experiment***

34 We used data from a growth chamber experiment (Flynn & Wolkovich, 2018) to assess the phenological cue  
35 interaction with the duration of vegetative risk. Cuttings for the experiment were made in January 2015 at  
36 Harvard Forest (HF, 42.5°N, 72.2°W) and the Station de Biologie des Laurentides in St-Hippolyte, Québec  
37 (SH, 45.9°N, 74.0°W). The experiment considered here examined the 3 temperate trees and shrubs used in  
38 a fully crossed design of two levels of chilling (field chilling, field chilling plus 30 days at 4 °C), two levels of  
39 forcing (20°C/10°C or 15°C/5°C day/night temperatures, such that thermoperiodicity followed photoperiod)  
40 and two levels of photoperiod (8 versus 12 hour days) resulting in 12 treatment combinations. Observations  
41 on the phenological stage of each cutting were made every 2-3 days over 82 days. Phenology was assessed  
42 using a BBCH scale that was modified for trees (Finn *et al.*, 2007). We used the same statistical analyses  
43 as the original study: mixed-effects hierarchical models that included warming, photoperiod, and chilling  
44 treatments, and all two-way interactions as predictors and species modeled as groups.

The model equation is as from the original study:

$$\begin{aligned} y_i \sim N(\alpha_{sp[i]} + \beta_{site_{sp[i]}} + \beta_{forcing_{sp[i]}} + \beta_{photoperiod_{sp[i]}} + \beta_{chilling1_{sp[i]}} + \beta_{chilling2_{sp[i]}} \\ + \beta_{forcing \times photoperiod_{sp[i]}} + \beta_{forcing \times site_{sp[i]}} + \beta_{photoperiod \times site_{sp[i]}} \\ + \beta_{forcing \times chilling1_{sp[i]}} + \beta_{forcing \times chilling2_{sp[i]}} \\ + \beta_{photoperiod \times chilling1_{sp[i]}} + \beta_{photoperiod \times chilling2_{sp[i]}} \\ + \beta_{site \times chilling1_{sp[i]}} + \beta_{site \times chilling2_{sp[i]}}) \end{aligned}$$

And the  $\alpha$  and each of the 14  $\beta$  coefficients were modeled at the species level in the original study, as follows:

1.  $\beta_{site_{sp}} \sim N(\mu_{site}, \sigma^2_{site})$
- ...
14.  $\beta_{site \times chilling2_{sp}} \sim N(\mu_{site \times chilling2}, \sigma^2_{site \times chilling2})$

45 **Predictable Regional Differences in Climate, Species Responses and False Spring**  
46 **Risk - *climate data and phenology data***

47 We analyzed five archetypal regions across North America and Europe. We collected phenology data through  
48 the USA National Phenology Network (USA-NPN), using their Data Visualization tool to gather Extended  
49 Spring Index values (SI-x) by accessing the “Spring Indices, Historic Annual” gridded layer and looking  
50 specifically at “First Leaf - Spring Onset” (USA-NPN, 2016a). We looked at each SI-x value for each North  
51 American site (i.e. Waterville, ME, Yakima, WA, and Reidsville, NC) from 1981-2016 to evaluate the spread  
52 of spring onset dates for those regions. SI-x data is only available for this timeframe and is based off the  
53 phenology of *Syringa vulgaris*, so we additionally used modeled plant phenology data in those regions from  
54 1982-2006 (White *et al.*, 2009). For the European sites (i.e. Bamberg, Germany and Lyon, France) we used  
55 phenology studies that assessed multiple years of budburst to leafout dates (i.e., 2005-2013, Soudani *et al.*  
56 (2012) and 1880-1999, Schaber & Badeck (2005)) using remote-sensing and NDVI (Soudani *et al.*, 2012) and  
57 on-the-ground phenological observations for the dominant species in those regions (Schaber & Badeck, 2005).  
58 Species included in these studies were *Aesculus hippocastanum*, *Betula pendula*, *Fagus sylvatica*, *Molinia*  
59 *caerulnea*, *Pinus pinaster*, *Quercus ilex*, *Quercus patraea*, *Quercus robur*, and *Syringa vulgaris*. Using these  
60 data, we were able to determine the range of durations of vegetative risk over time. We then collected  
61 climate data by downloading Daily Summary climate datasets from the NOAA Climate Data Online tool  
62 (data available online<sup>2</sup>). We gathered 50 years of climate data for each location from NOAA, then calculated  
63 the number of years that fell below -2.2°C within the budburst to leafout date range for each region.

---

<sup>2</sup><https://www.ncdc.noaa.gov/cdo-web/search?datasetid=GHCND>

## References

- Ault, T.R., Schwartz, M.D., Zurita-Milla, R., Weltzin, J.F. & Betancourt, J.L. (2015a) Trends and natural variability of spring onset in the coterminous United States as evaluated by a new gridded dataset of spring indices. *Journal of Climate* **28**, 8363–8378.
- Ault, T.R., Zurita-Milla, R. & Schwartz, M.D. (2015b) A Matlab© toolbox for calculating spring indices from daily meteorological data. *Computers & Geosciences* **83**, 46–53.
- Finn, G.A., Straszewski, A.E. & Peterson, V. (2007) A general growth stage key for describing trees and woody plants. *Annals of Applied Biology* **151**, 127–131.
- Flynn, D.F.B. & Wolkovich, E.M. (2018) Temperature and photoperiod drive spring phenology across all species in a temperate forest community. *New Phytologist* **219**.
- O’Keefe, J. (2014) Phenology of woody species at Harvard Forest since 1990.
- Schaber, J. & Badeck, F.W. (2005) Plant phenology in Germany over the 20th century. *Regional Environmental Change* **5**, 37–46.
- Schwartz, M.D. (1997) Spring Index Models: An approach to connecting Satellite and surface phenology. *Phenology of Seasonal climates*, pp. 23–38.
- Schwartz, M.D., Ault, T.R. & Betancourt, J.L. (2013) Spring onset variations and trends in the continental United States: Past and regional assessment using temperature-based indices. *International Journal of Climatology* **33**, 2917–2922.
- Soudani, K., Hmimina, G., Delpierre, N., Pontailleur, J.Y., Aubinet, M., Bonal, D., Caquet, B., de Grandcourt, A., Burban, B., Flechard, C. & et al. (2012) Ground-based Network of NDVI measurements for tracking temporal dynamics of canopy structure and vegetation phenology in different biomes. *Remote Sensing of Environment* **123**, 234–245.
- USA-NPN (2016a) USA National Phenology Network Data Visualizer Tool.
- USA-NPN (2016b) USA National Phenology Network Extended Spring Indices.
- White, M.A., De Beurs, K.M., Didan, K., Inouye, D.W., Richardson, A.D., Jensen, O.P., O’Keefe, J., Zhang, G., Nemani, R.R., Van Leeuwen, W.J.D. & Al., E. (2009) Intercomparison, interpretation, and assessment of spring phenology in North America estimated from remote sensing for 1982–2006. *Global Change Biology* **15**, 2335–2359.
